# Supplementary material
Source: ML conference proceedings conference paper supplement (https://openaccess.thecvf.com/content/CVPR2022/html/Lee_DPICT_Deep_Progressive_CVPR_2022_paper.html)
Supplement: Supplementary file 1 [file Lee_DPICT_Deep_Progressive_CVPR_2022_supplemental.zip]

Archive with 2 entries (2 files):
- 04515_supp.pdf
- 04515_video.mp4
